1 Distribution of iridescent colours in hummingbird communities  
2 results from the interplay between selection for camouflage and  
3 communication

4 Hugo Gruson<sup>a</sup>, Marianne Elias<sup>b</sup>, Juan L. Parra<sup>c</sup>, Christine Andraud<sup>d</sup>, Serge Berthier<sup>e</sup>,  
5 Claire Doutrelant<sup>a</sup>, and Doris Gomez<sup>a,e</sup>

6 <sup>a</sup>CEFE, Univ Montpellier, CNRS, Univ Paul Valéry Montpellier 3, EPHE, IRD,  
7 Montpellier, France

8 <sup>b</sup>ISYEB, CNRS, MNHN, Sorbonne Université, EPHE, 45 rue Buffon CP50, Paris, France

9 <sup>c</sup>Grupo de Ecología y Evolución de Vertebrados, Instituto de Biología, Universidad de  
10 Antioquia, Medellín, Colombia

11 <sup>d</sup>CRC, MNHN, Ministère de la Culture et de la Communication, CNRS, Paris, France

12 <sup>e</sup>INSP, Sorbonne Université, CNRS, Paris, France

13 **Abstract**

14 Identification errors between closely related, co-occurring, species may lead to misdirected  
15 social interactions such as costly interbreeding or misdirected aggression. This selects for di-  
16 vergence in traits involved in species identification among co-occurring species, resulting from  
17 character displacement. On the other hand, predation may select for crypsis, potentially leading  
18 co-occurring species that share the same environment to have similar appearance. Few studies  
19 have explored these antagonistic processes at the community level. Here, we assess colour clus-  
20 tering and overdispersion in multiple hummingbird communities across Ecuador and identify the  
21 processes at stake by controlling for species phylogenetic relatedness. In hummingbirds, most  
22 colours are iridescent structural colours, defined as colours that change with the illumination  
23 or observation angle. Because small variations in the underlying structures can have dramatic  
24 effects on the resulting colours and because iridescent structures can produce virtually any hue

25 and brightness, we expect iridescent colours to respond finely to selective pressures. Moreover,  
26 we predict that hue angular dependence – a specific aspect of iridescent colours – may be used as  
27 an additional channel for species recognition. In our hummingbird assemblages in Ecuador, we  
28 find support for colour overdispersion in specific body patches at the community level even after  
29 controlling for the phylogeny, especially on iridescence-related traits, suggesting character dis-  
30 placement among co-occurring species. We also find colour clustering at the community level on  
31 patches involved in camouflage, which may counter-balance the effect of character displacement.

32 **Keywords:** Reproductive Character Displacement, Agonistic Character Displacement, Camou-  
33 flage, Structural Colours, Angle-Dependent Colouration, Community structure, Ecuador

34

35 Colour is a complex communication channel widespread among various taxa and involved in  
36 many ecological and evolutionary processes [1]. It can be described by multiple variables, including  
37 hue (colour in its common sense, such as red, green, blue, etc.) and brightness (average level of grey  
38 of a colour, i.e. whether the object is light or dark). Colours can be produced by two non-mutually  
39 exclusive means: pigmentary colours are produced by the selective absorption of incoming light by  
40 pigments, while structural colours are produced by the interaction of incoming light with nanostruc-  
41 tures, causing diffraction, interferences or scattering [2]. Among structural colours, iridescent colours  
42 are characterised by a shift in hue with changes in illumination or observation angle [3]. Iridescent  
43 colours are found in many bird families such as Anatidae (ducks) Phasianidae (fowls), Sturnidae  
44 (starlings), or Trochilidae (hummingbirds), and thought to be involved in numerous adaptations [4].  
45 But evolution of iridescent colours at the community level remains poorly understood. Yet, they  
46 may display evolutionary patterns that differ from non-iridescent colours. Indeed, as opposed to  
47 other types of colours, iridescent colours can produce virtually any hue and are expected to respond  
48 more readily and finely to selection, because large changes of hue can be achieved by small changes  
49 in the underlying structures [5]. They can also result in directional colours only seen at specific  
50 angles, as well as highly reflective colours [6].

51 Because colours are involved in many different ecological processes, they are subject to multiple  
52 selection pressures, often with opposite effects [7]. For example, colour can reduce predation risk  
53 via crypsis or aposematism or serve as a means of species identification. In this case, two opposite  
54 evolutionary forces act on colours: (i) On the one hand, species living in the same environment are

55 likely experiencing similar selective pressures, such as predation. The environment is characterised  
56 by ambient light and vegetation, which both influence greatly which colours are poorly detectable  
57 and which colours are highly detectable [8, 9]. We thus expect co-occurring species to converge in  
58 coloration and harbour poorly detectable colours as this would decrease the risk of being detected by  
59 predators. Colour clustering can result from convergence between sympatric species (evolutionary  
60 process), from environmental filtering (ecological process), i.e. species assortment locally according  
61 to the traits they harbour, or a mixture of the two (detailed in table S1). (ii) On the other hand,  
62 sympatric closely-related species are more likely to face problems of species recognition, eventually  
63 resulting in reproductive interference - a phenomenon where an individual courts or mates with  
64 individuals of another species, producing no offspring or low fertility hybrids, leading to costly inter-  
65 breeding [10]. Species misidentification can also lead to misdirected aggression and costly fighting  
66 when individuals compete over resources or territories. Hence, any feature that would enhance  
67 species recognition is expected to be selected for. In this context, closely related species living in  
68 sympatry should be under strong selective pressure to diverge in traits involved in communication,  
69 if divergence enhances species recognition. Divergence can result from a process called character  
70 displacement (RCD for reproductive character displacement, ACD for agonistic character displace-  
71 ment; evolutionary process) [11–13] or from species assortment (ecological process). For ACD, it is  
72 worth noticing that traits are expected to diverge only in case of moderate ecological competition,  
73 they should converge in case of high competition [13, 14]. Multiple empirical studies have shown  
74 character displacement for songs (e.g. Gerhardt [15] in frogs and Grant and Grant [16] in birds), or  
75 olfactory signals [17]. However, fewer studies have looked at divergence in colour patterns (but see  
76 Sætre et al. [18], Naisbit et al. [19], Lukhtanov et al. [20], Martin et al. [21], Doutrelant et al. [22],  
77 and Hemingson et al. [23]). Almost all these studies were at the species level, and at best involved  
78 comparison between closely related species. Many of them also did not use objective spectrometry  
79 measurements and instead relied on human vision, which is likely to have biased their results [24,  
80 25].

81 In birds, it has been argued that colouration is under different selective pressures depending on  
82 the body patch location: dorsal patches are mainly involved in camouflage while ventral and facial  
83 patches are mainly involved in communication [7, 26]. In this study, we test this hypothesis for  
84 iridescent colours at the community level by looking at phenotypic structure in hummingbird local

85 assemblages across different body parts. Accordingly, we predict that co-occurring hummingbird  
86 species should display similar hues on dorsal patches, leading to phenotypic clustering of hues (i.e.  
87 co-occurring species are more similar than expected by chance, prediction 1) and different hues  
88 on ventral patches, resulting in a phenotypic overdispersion pattern (i.e. co-occurring species are  
89 more dissimilar than expected by chance, prediction 2). For brightness, we can formulate two  
90 alternative predictions: on the one hand, it might evolve in the same way as hue, also because of  
91 reproductive character displacement and selection for camouflage, leading to the same outcome as  
92 for hue (prediction 3, equivalent to predictions 1 and 2 but for brightness). On the other hand,  
93 because brightness level positively correlates with signal conspicuousness, poorly detectable signals  
94 have similar brightness, and highly detectable signals have similar brightness. Hence, we may instead  
95 expect that species co-occurring should converge for brightness on all patches (prediction 3bis) if  
96 the same patches are involved in the same ecological process (communication or camouflage).

97 Compared to other types of colouration, iridescent colours might enable species recognition on  
98 another dimension in the sensory space. Two species can have the same hue or brightness at a given  
99 angle but can differ at another angle, via an additional variable we call "hue shift". Because hue shift  
100 cannot be seen at large distances, it may allow species to diverge without interfering with camouflage  
101 against predators [4]. Accordingly, we predict overdispersion for hue shift not only on ventral patches,  
102 but also on dorsal patches (prediction 4). However, hue shift is often highly correlated with hue due  
103 to the optics underlying iridescence (Dakin and Montgomerie [27] for example reported  $R^2 \geq 0.95$   
104 for the correlation between hue and hue shift). We test this correlation with the data from this  
105 article and discuss how it may impact our results.

106 At the community level, we predict that community colour volume (also known as functional  
107 richness  $FRic$  in functional ecology [28]) and brightness range increase with species richness more  
108 than expected in a random species assemblage (null model) because co-occurring species would use  
109 different colours (hue or brightness) (prediction 5).

110 Here we test our five predictions by quantifying both iridescent and non-iridescent colours of 189  
111 hummingbird assemblages in Ecuador that include 112 species and span a large variety of habitats,  
112 and by assessing the phenotypic structure (clustering, random distribution, overdispersion of colours)  
113 and correct that for the expectation given species phylogenetic relatedness within these assemblages.  
114 Comparing the uncorrected and the phylogenetically-corrected phenotypic structure of hummingbird

115 communities will allow us to identify which mechanisms (character displacement, species assortment  
116 with mutual exclusion of similar species, environmental filtering; as detailed in table S1) underlie  
117 the community structure of iridescent colours in hummingbirds.

## 118 **Materials and methods**

### 119 **Community data**

120 Hummingbirds are particularly suited as a study system to explore the possible effect of reproductive  
121 character displacement on iridescent colours because (i) they display a large variety of hues [29] and  
122 all species harbour some iridescent patches, many of which have a very strong angular dependence,  
123 rapidly shifting from pink to green or black [30, 31] (but note that many hummingbirds species also  
124 have non-iridescent, pigmentary, patches), (ii) they belong to a very speciose family whose phylogeny  
125 is well established and readily available [32, 33], (iii) they live only in the Americas, especially in the  
126 tropics where numerous species can coexist locally [29] and (iv) almost all species are available in  
127 museum collections and their colour can be objectively measured using spectrometric measurements  
128 [34].

129 Presence/absence data for hummingbird assemblages at 189 sites in Ecuador (see map in fig. S3)  
130 were compiled from data in peer-reviewed papers and reports from environmental organisations [35].  
131 These sites cover a large variety of elevation ranges (fig. S3) and habitats [35, 36]. This dataset  
132 was previously thoroughly reviewed by comparing the observations with the known elevational and  
133 geographical ranges of each species [36] and includes observations of 112 of the 132 hummingbirds  
134 species found in Ecuador [37].

### 135 **Colour measurements and analyses**

136 For each one of the 112 species, we borrowed one male from either the Museum National d'Histoire  
137 Naturelle (MNHN) in Paris or the Musée des Confluences, in Lyon (full list in Online Supplementary  
138 Information). When multiple subspecies were living in the area where presence was recorded, we  
139 randomly picked one of them. We consistently took spectral reflectance measurements on the 8  
140 following patches (described in fig. S1): crown, back, rump, tail, throat, breast, belly, wing. We also  
141 made additional measurements on patches that visually differed in colouration from these 8 main

142 ones, as in Gomez and Théry [7] and Doutrelant et al. [22].

143 We measured reflectance using a setup similar to Meadows et al. [38], relying on the use of  
144 two separate optical fibres. Light was conducted from an Oceanoptics DH-2000 lamp emitting over  
145 the 300-700 nm range of wavelengths to which birds are sensitive [39] to the sample through an  
146 illuminating FC-UV200-2-1.5 x 100 optical fibre (named illumination fibre). Light reflected by the  
147 sample was then collected by a second identical optical fibre (named collection fibre) and conducted  
148 toward an Oceanoptics USB4000 spectrophotometer (used with the SpectraSuite 2.0.162 software).  
149 This setup allows for a precise independent rotation of the illumination and the collection fibres,  
150 necessary for the measurements of iridescent colours [6]. For more details about the measurement  
151 conditions as recommended in White et al. [40], see SI.

152 For every patch, we recorded a first reflectance spectrum at the position of the fibres which  
153 maximised total reflectance. To measure hue angle dependency (iridescence), we then moved both  
154 fibres  $10^\circ$  away from the previous position and recorded a second spectrum, as in Meadows et al.  
155 [41]. More recent measurement methods revealed that it would be more accurate to keep the angular  
156 span between the illumination and collection fibres constant [42]. We however confirmed that this  
157 did not impact our results by running our analyses once with all data and once with only data at  
158 a given angular span (which represented 94 % of the total data). All measurements were performed  
159 in a dark room with temperature control. Recorded spectra were normalised by an Avantes WS-1  
160 white standard and a measurement with the lamp shut down (dark reference) and integration times  
161 were determined for each sample as to maximise the intensity of the signal without saturating the  
162 spectrometer.

163 Final values were averaged over 5 consecutive measurements and spectra were smoothed using a  
164 loess algorithm and interpolated every 1nm and negative values were set to zero using the R package  
165 `pavo` [43].

166 We analysed spectra using Endler and Mielke [44] model with relative quantum catches  $Q_i$   
167 (without Fechner's law). All birds are tetrachromats and can see light with wavelengths from  
168 300 to 700 nm, which includes ultra-violet light (UV) [45]. But different bird species vary in their  
169 sensitivity [46]: some are called UV-sensitive (UVS) while others are violet-sensitive (VS). Literature  
170 on colour vision in hummingbirds suggests that both types are found within the family (see Chen  
171 and Goldsmith [39] and Herrera et al. [47] for UVS species and Ödeen and Håstad [48] for VS

172 species). Because we did not have enough information to compute ancestral states and vision type  
173 for all species in our study and because it was found to have little influence in previous studies [7],  
174 we ran our analyses as if all species were VS, using the spectral sensitivities of a typical VS bird,  
175 *Puffinus pacificus* [49]. We used different illuminants defined in Endler [8], depending on the habitat  
176 of the species described in Stotz et al. [50] (detailed in SI): "large gaps" illumination was used for  
177 species living in the canopy while "forest shade" was used for species living in the understory. Hue  
178 was a tridimensional variable defined by the position ( $x$ ,  $y$  and  $z$ ) of the reflectance spectrum in the  
179 tetrahedron representing bird colour vision space [44] and brightness was defined as in Endler and  
180 Mielke [44] (perceived intensity of colour, also sometimes referred to as luminance). We ensured  
181 that all indices were repeatable (table S2) using the `rptR` R package [51]. We add another variable  
182 to describe iridescence: hue shift, defined as the difference between hue at maximum reflectance and  
183 hue at  $10^\circ$  away from maximum reflectance, in a similar fashion to Dakin and Montgomerie [27].  
184 Because it is the difference of two tridimensional variables (hue at the position where reflectance  
185 was maximum and hue at  $10^\circ$  away), hue shift is tridimensional as well. Dakin and Montgomerie  
186 [27] found a high correlation between hue and hue shift at the intraspecific level in the peacock *Pavo*  
187 *cristatus*, we also report a high correlation at the interspecific level in hummingbirds by performing  
188 a linear regression in  $\mathbb{R}^3$  between hue and hue shift ( $R^2 = 0.51$ ,  $F(3; 1372) = 469.7$ ,  $p < 0.0001$ ).  
189 New measurement methods have since been developed and propose a new definition for hue shift  
190 which is not correlated to hue but they were not available at the time of this study [42].

191 We analysed the colour volume for each species by measuring the convex hull volume of all colour  
192 patches on the bird, as suggested in Stoddard and Prum [52]. We compared the relationship between  
193 the colour volume of a community and the number of species within this community relative to a  
194 null model (prediction 5) obtained by creating random assemblages from a species pool containing  
195 all species from all communities.

196 However, the colour volume does not differentiate the different patches on the bird, raising several  
197 concerns. First, two species could use the same colour but at different places on their body. They  
198 would then look different to an observer but not identified as such in this analysis. Additionally, we  
199 expect different evolutionary signals on different patches, that could even each other out, and blur  
200 the outcome at the bird level. For these reasons, we also performed our analyses separately for each  
201 one of the following eight patches: crown, back, rump, tail, throat, breast, belly, wing (locations

202 shown in fig. S1).

## 203 **Trochilidae phylogeny and comparative analyses**

204 A distribution of 100 phylogenetic trees of the Trochilidae family was downloaded from birdtree.org  
205 [32] to take into account phylogenetic uncertainty in the comparative analyses [53]. The 112 species  
206 included in this study constitute a fairly even sampling of the hummingbird phylogeny (fig. S2).

207 We used the method developed by Hardy and Senterre [54] and Baraloto et al. [55] to analyse  
208 respectively the phylogenetic ( $\Pi_{ST}$ ) and phenotypic ( $\tau_{ST}$ ) structures of the hummingbird commu-  
209 nities of Ecuador (clustering or overdispersion). This method relies on computing indices inspired  
210 by the Simpson index and the fixation index  $F_{ST}$ , comparing the observed diversity within and  
211 between the communities. For phylogeny,  $\Pi_{ST}$  can reveal phylogenetic clustering ( $\Pi_{ST} > 0$ ) or  
212 phylogenetic overdispersion ( $\Pi_{ST} < 0$ ) within communities. Likewise, for phenotypic traits,  $\tau_{ST}$  can  
213 reveal phenotypic clustering ( $\tau_{ST} > 0$ ) or phenotypic overdispersion ( $\tau_{ST} < 0$ ) within communities.  
214 Statistical significance of overdispersion or clustering is obtained from comparing the observed value  
215 to that obtained from 1000 random communities (created by drawing from the total species pool,  
216 using algorithm 1s from Hardy [56], which keeps the local species richness per site constant). This  
217 approach compares the phenotypic structure to what would be expected by chance.

218 To disentangle the relative effect of ecological (species assortment) and evolutionary mechanisms  
219 (selection), we also perform our analyses by taking into account the phylogenetic relationships be-  
220 tween species. If the species in the community are more clustered or overdispersed than expected  
221 given their phylogenetic relationships, this is taken as evidence that the trait has not evolved in a  
222 Brownian fashion (detailed in table S1). To this end, we used the `decouple` function [57], which  
223 returns phylogenetically predicted and residual trait values by performing a linear regression of in-  
224 dividual trait values explained by the phylogeny. We computed the value of  $\tau_{ST}$  on trait values  
225 decoupled from the phylogeny. This value is hereafter denoted  $dc\tau_{ST}$ . Similarly to the classical  $\tau_{ST}$ ,  
226 the sign of  $dc\tau_{ST}$  indicates phenotypic clustering ( $dc\tau_{ST} > 0$ ) or overdispersion ( $dc\tau_{ST} < 0$ ) once  
227 the effect of the phylogenetic structure of the communities has been removed.

228 Analyses performed on a tree distribution ( $\Pi_{ST}$  and  $dc\tau_{ST}$ ) with  $n$  trees return a distribution of  
229  $n$  statistics values and  $n$  p-values  $p_i$ . We summarised this information by computing the median of  
230 the statistics and the overall p-value  $p$  by using Jost's formula [58]:



$$p = k \sum_{i=0}^{n-1} \frac{(-\ln(k))^i}{i!} \quad \text{where } k = \prod_{i=1}^n p_i \quad (1)$$

## 231 Results

232 We find a strong phylogenetic clustering within communities ( $\Pi_{ST} = 0.062 > 0$ ,  $p < 0.0001$ ),  
233 indicating that co-occurring species are more closely related than expected by chance.

### 234 Phenotypic structure of the communities (predictions 1 - 4)

235 When looking at the bird entire body (when all patches are included simultaneously) by computing  
236 the overlap of the colour volumes, we did not find any phenotypic structure.

237 When the different major patches (crown, back, rump, tail, throat, breast, belly and wing) are  
238 examined separately (table 1 and table S3), we find clustering ( $\tau_{ST} > 0$ ) in hue and hue shift on the  
239 back, rump, tail, belly and wing. Once we remove the effect of the shared evolutionary history with  
240 the `decouple` function, we find clustering on the crown and the back ( $dc\tau_{ST} > 0$ ) but overdispersion  
241 on the belly for both hue and hue shift ( $dc\tau_{ST} < 0$ ). Hue shift is also overdispersed on the rump  
242 and the tail ( $dc\tau_{ST} < 0$ ). There is no phenotypic structure on the throat, breast or wing for hue  
243 and hue shift nor on the rump or the tail for hue.

244 We find no phenotypic structure (neither clustering nor overdispersion) for brightness on any  
245 patches before phylogenetic correction. After phylogenetic correction, brightness values for the  
246 throat, breast and belly are clustered among co-occurring species ( $dc\tau_{ST} > 0$ ) but show no pheno-  
247 typic structure for the crown, the back, the wing and the tail.

### 248 Effect of community species richness on colour characteristics (prediction 5)

249 We found that the brightness range within a community increased in the same way as a null model  
250 built from random species assemblages (fig. 1b). For colour volume, we find some outliers with a  
251 higher colour volume than expected for community with the same number of species (fig. 1a).

| Variable                 | Phenotypic structure ( $\tau_{ST}$ ) | Decoupled phenotypic structure ( $dc\tau_{ST}$ ) |
|--------------------------|--------------------------------------|--------------------------------------------------|
| Hue                      |                                      |                                                  |
| Brightness               |                                      |                                                  |
| Hue shift (=iridescence) |                                      |                                                  |

Table 1: Phenotypic structure of hummingbird communities for different variables (hue, brightness and hue shift) on the patches studied (crown, back, rump, tail, throat, breast, belly, wing; names and locations illustrated in fig. S1). Hue is a tridimensional variable defined by the reflectance spectrum position  $x$ ,  $y$  and  $z$  in the tetrahedron representing avian colour space. Blue plus sign  $+$  patterns indicate significant phenotypic clustering ( $\tau_{ST}$  or  $dc\tau_{ST} > 0$ ), orange minus sign  $-$  indicate significant phenotypic overdispersion ( $\tau_{ST}$  or  $dc\tau_{ST} < 0$ ), and green zero  $0$  patterns represent the absence of phenotypic structure. The left column shows the raw phenotypic structure of the community, which may be influenced by the phylogenetic structure while the right column shows the phenotypic structure of the community, decoupled from all effects caused by the phylogeny. Exact values for the statistics are available in table S3.

## 252 **Discussion**

253 Our findings suggest that colour structure within hummingbird communities results from a trade-off  
254 between selection for camouflage (leading to phenotypic clustering) and species recognition (leading  
255 to phenotypic overdispersion). This balance between selective pressure acting in opposite directions  
256 produces a complex phenotypic structure when looking at different patches on the body.

### 257 **Evidence for different evolutionary scenarios depending on patch location**

258 At the entire bird level (i.e. when pooling together all patches), we did not find any phenotypic  
259 structure

260 As predicted in our prediction 5, community colour volume (as estimated by the convex hull of  
261 hue and brightness range within a community) increases slightly faster with the number of species  
262 in the community than predicted by a null model. This suggests that co-occurring species in these  
263 communities tend to use less different colours than expected by chance. However, this is not the  
264 cause for the majority of communities, where co-occurring species do not use more nor less similar  
265 colours than expected by chance. This is further confirmed by the absence of phenotypic structure  
266 on the colour volume and the brightness when the effect of the phylogeny is not removed.

267 This could be the consequence of similar selective pressures between the communities we studied,  
268 leading colours in all assemblages to be randomly determined. This is however not very likely  
269 because the communities we studied differ a lot in both their vegetation background and therefore  
270 in the pressure for crypsis [35] and in their species composition. A more likely hypothesis is that  
271 co-occurring species tend to use the same colours but not necessarily on the same patches. This is  
272 confirmed by our analysis patch by patch, where we find either clustering or overdispersion depending  
273 on the location of the patch.

### 274 **Selection for convergence and phenotypic clustering**

275 In accordance with our predictions, co-occurring hummingbird species tend to have similar hues  
276 on patches more likely dedicated to camouflage (back, rump, tail, wing; prediction 1) but not  
277 on patches more likely used in communication (crown, throat, breast; prediction 2), as shown in  
278 table 1 and table S3. This new result for iridescence colours matches what has been previously

279 described for non-iridescent colours [7]. The phenotypic clustering observed for hue on the rump,  
280 the tail and the wing vanishes after removing the clustering effect due to phylogenetic structure.  
281 This means that phenotypic clustering of hue on the rump, the tail and the wing is not caused by  
282 convergent evolution of co-occurring species but by environmental filtering, leading related, similar-  
283 looking species to live in the same area (as explained in table S1). This is confirmed by the high  
284 value of phylogenetic clustering. Using different methods on the same dataset, Graham et al. [35]  
285 also found significant phylogenetic clustering in 37 communities and overdispersion in only one.  
286 This phylogenetic clustering may be caused by a strong niche conservatism but our study cannot  
287 discriminate whether such niche conservatism involves colour or other ecological traits. However,  
288 hummingbirds' costly hovering flight at high elevation [59–61] and high foraging specialisation [62]  
289 likely contribute to this pattern. Alternatively, phylogenetic clustering could also be caused by a  
290 very low dispersal ability of hummingbirds.

291 Contrary to our prediction 2, we also find clustering of hue on the belly before the use of the  
292 `decouple` function. However, the fact that it turns into overdispersion after the use of the `decouple`  
293 function, and not simply into a random phenotypic structure (as opposed to the rump, the tail and  
294 the wing mentioned just before), suggests this initial clustering is mainly caused by environmental  
295 filtering on another trait. This other trait may be the colour of another patch or other ecological  
296 traits, as we explained previously.

297 We found a significant clustering of brightness on the throat, breast and belly after controlling  
298 for the phylogeny, indicating that brightness on those patches is more similar than expected given  
299 the phylogeny among co-occurring species (prediction 3bis). This suggests that the same patches  
300 have been selected to be involved either in communication or in camouflage among species living in  
301 the same environment. This is seen after controlling for the phylogeny and it is therefore not caused  
302 by the phylogenetic relatedness of co-occurring species. Two main hypotheses can explain why  
303 co-occurring species tend to communicate (or camouflage themselves) using the same patches: (i)  
304 There may be selective pressures for the use of specific patches in camouflage in a given environment  
305 (e. g., patches that are more exposed to predators' sight). (ii) Convergence in patches used in  
306 communication may be selected because it improves competitor identification in the case of a strong  
307 ecological niche overlap (convergence by agonistic character displacement as shown in Grether et al.  
308 [13] and Tobias et al. [63]).

309 All those results suggest a strong effect of the environment in the evolution of colour in agree-  
310 ment with McNaught and Owens [64] who found that bird plumage colour was due to the light  
311 environment and not to reproductive character displacement in Australian birds. However, we do  
312 not find clustering on all patches, which means that the effect of habitat pressure is somehow limited  
313 or counterbalanced by reproductive or agonistic character displacement. On the contrary, for some  
314 patches, we found patterns that are likely the result of character displacement.

### 315 **Character displacement and phenotypic overdispersion**

316 In agreement with our prediction 2, after removing the effect of the phylogeny, there is overdispersion  
317 of hue on the belly, likely caused by character displacement (table S1). At a completely different  
318 taxonomic scale, focusing on a single hummingbird genus (*Coeligena*) with 11 species, Parra [26]  
319 also found that the belly was always involved in the difference in hue between subspecies. It was  
320 sometimes even the only patch causing those differences, as for example between *Coeligena torquata*  
321 *fulgidigula* and *Coeligena torquata torquata*. This suggests that the interspecific divergence we found  
322 on the belly at the community level on the whole Trochilidae family can be observed at different  
323 geographic and taxonomic scales, and even between subspecies of the same species.

324 As predicted, we also find more phenotypic overdispersion for hue shift than hue after removing  
325 the effect of the phylogeny, for example, on the rump and on the tail (prediction 4). It is possible  
326 that hue shift is less sensitive to selection for convergence because it may vary without disturbing  
327 camouflage efficacy. However, we did not find the expected relaxing of clustering on hue shift  
328 on patches such as the back. This is likely caused by the fact that hue shift is highly correlated  
329 with hue, as found in this study and in Dakin and Montgomerie [27], who used the same indices  
330 to quantify iridescence. This correlation is due to the optics controlling iridescence, meaning that  
331 species that display similar hues should also display the same hue shift if they use the same underlying  
332 multilayer structures. The fact that the correlation is not perfect and that we nonetheless get  
333 different phenotypic patterns for hue and hue shift on some patches suggests that co-occurring species  
334 use different multilayer structures, which can produce different iridescent effects while displaying the  
335 same hue (functional convergence on hue).

336 Against our prediction 2, we did not find phenotypic overdispersion on any of the colour vari-  
337 ables on patches such as the throat or the crown, that are thought to be sexually selected and often

338 used in courtship displays [65, 66]. Several hypotheses can explain this fact: (i) The overdispersion on some patches (hue on the belly and hue shift on the rump and tail) is sufficient to enable  
339 species recognition. (ii) The current phenotypic structure, which is neither overdispersed nor clustered, on those patches is sufficient to enable species recognition. Indeed, the absence of phenotypic  
340 overdispersion does not mean that species look the same. It simply means that colour differences  
341 between species living in the same community and species in different communities occur in similar  
342 ranges. This difference may be sufficient to relax the selective pressure towards reproductive character displacement. (iii) The pressure towards overdispersion is balanced by habitat filtering (for both  
343 ventral and dorsal patches), resulting in no apparent phenotypic structure. The latter hypothesis  
344 was also a candidate explanation of the pattern found by Martin et al. [21], where sympatric closely  
345 related species are more divergent than allopatric ones, but only when the range overlap is limited.  
346 They suggested that local adaptation could hinder divergence when species ranges was exactly the  
347 same. (iv) Species recognition is achieved by additional means and divergence occurs on others traits,  
348 such as modified feathers [67], song [68, 69] or non-vocal noises [70–72] and size. Notably, different  
349 species of hummingbirds can have very different courtship behaviour: leks for hermits [73, 74], dives  
350 and shuttle displays for bees [71, 75, 76], for instance.

354 Taken together, our results suggest that hummingbird iridescent colours are determined by different evolutionary mechanisms depending on their location. Within a community, co-occurring  
355 hummingbird species tend to use the same hue on dorsal, large, patches probably because of the  
356 evolutionary pressure for camouflage, causing phenotypic clustering at the community level. This  
357 phenotypic clustering does not seem to be caused by adaptive convergence on colours but rather by  
358 environmental filtering perhaps linked to other ecological traits such as elevation tolerance or flight  
359 ability. In spite of such environmental filtering, character displacement leads to overdispersion for  
360 hue on the belly and hue shift on the rump and the tail. Iridescence may therefore enable species  
361 recognition without affecting camouflage efficacy of birds, by opening up a new dimension in the  
362 sensory space: hue shift.

## 364 Acknowledgments

365 This project heavily relied on museum specimens which were made available by the work of col-  
366 lection curators: Patrick Boussès, Anne Previato, and Jérôme Fuchs (Muséum National d'Histoire  
367 Naturelle), Cédric Audibert and Harold Labrique (Musée des Confluences).

## 368 References

- 369 [1] JW Bradbury and SL Vehrencamp. *Principles of Animal Communication*. 2. ed. OCLC:  
370 759797180. Sunderland, Mass: Sinauer Associates, 2011. 697 pp. ISBN: 978-0-87893-045-6.
- 371 [2] AR Parker. “515 Million Years of Structural Colour”. In: *Journal of Optics A: Pure and Applied*  
372 *Optics* 2.6 (2000), R15–R28. DOI: 10.1088/1464-4258/2/6/201.
- 373 [3] P Vukusic. “Natural Photonics”. In: *Physics World* 17.2 (2004), p. 35. DOI: 10.1088/2058-  
374 7058/17/2/34.
- 375 [4] SM Doucet and MG Meadows. “Iridescence: A Functional Perspective”. In: *Journal of The*  
376 *Royal Society Interface* 6 (Suppl 2 2009), S115–S132. DOI: 10.1098/rsif.2008.0395.focus.  
377 pmid: 19336344.
- 378 [5] RO Prum. “Anatomy, Physics, and Evolution of Structural Colors”. In: *Bird Coloration, Vol-*  
379 *ume 1: Mechanisms and Measurements*. Ed. by GE Hill and KJ McGraw. Vol. 1. 2 vols. Bird  
380 Coloration. Harvard University Press, 2006, p. 640. ISBN: 978-0-674-01893-8.
- 381 [6] DC Osorio and AD Ham. “Spectral Reflectance and Directional Properties of Structural Col-  
382 oration in Bird Plumage”. In: *Journal of Experimental Biology* 205.14 (2002), pp. 2017–2027.  
383 pmid: 12089207.
- 384 [7] D Gomez and M Théry. “Simultaneous Crypsis and Conspicuousness in Color Patterns: Com-  
385 parative Analysis of a Neotropical Rainforest Bird Community”. In: *The American Naturalist*  
386 169.s1 (2007), S42–S61. DOI: 10.1086/510138.
- 387 [8] JA Endler. “The Color of Light in Forests and Its Implications”. In: *Ecological Monographs*  
388 63.1 (1993), pp. 1–27. DOI: 10.2307/2937121.

- 389 [9] D Gomez and M Théry. “Influence of Ambient Light on the Evolution of Colour Signals:  
390 Comparative Analysis of a Neotropical Rainforest Bird Community”. In: *Ecology Letters* 7.4  
391 (2004), pp. 279–284. DOI: 10.1111/j.1461-0248.2004.00584.x.
- 392 [10] J Gröning and A Hochkirch. “Reproductive Interference Between Animal Species”. In: *The*  
393 *Quarterly Review of Biology* 83.3 (2008), pp. 257–282. DOI: 10.1086/590510.
- 394 [11] WL Brown and EO Wilson. “Character Displacement”. In: *Systematic Biology* 5.2 (1956),  
395 pp. 49–64. DOI: 10.2307/2411924.
- 396 [12] R Butlin. “Speciation by Reinforcement”. In: *Trends in Ecology & Evolution* 2.1 (1987), pp. 8–  
397 13. DOI: 10.1016/0169-5347(87)90193-5.
- 398 [13] GF Grether, N Losin, CN Anderson, and K Okamoto. “The Role of Interspecific Interference  
399 Competition in Character Displacement and the Evolution of Competitor Recognition”. In:  
400 *Biological Reviews* 84.4 (2009), pp. 617–635. DOI: 10.1111/j.1469-185X.2009.00089.x.  
401 pmid: 19681844.
- 402 [14] JA Tobias and N Seddon. “Signal Design and Perception in *Hypocnemis* Antbirds: Evidence  
403 for Convergent Evolution via Social Selection”. In: *Evolution* 63.12 (2009), pp. 3168–3189. DOI:  
404 10.1111/j.1558-5646.2009.00795.x. pmid: 19659594.
- 405 [15] HC Gerhardt. “Reproductive Character Displacement of Female Mate Choice in the Grey  
406 Treefrog, *Hyla Chrysoscelis*”. In: *Animal Behaviour* 47.4 (1994), pp. 959–969. DOI: 10.1006/  
407 *anbe*.1994.1127.
- 408 [16] BR Grant and PR Grant. “Songs of Darwin’s Finches Diverge When a New Species Enters the  
409 Community”. In: *Proceedings of the National Academy of Sciences* 107.47 (2010), pp. 20156–  
410 20163. DOI: 10.1073/pnas.1015115107. pmid: 21048082.
- 411 [17] PMB Bacquet, O Brattström, HL Wang, CE Allen, C Löfstedt, et al. “Selection on Male Sex  
412 Pheromone Composition Contributes to Butterfly Reproductive Isolation”. In: *Proceedings of*  
413 *the Royal Society B: Biological Sciences* 282.1804 (2015), p. 20142734. DOI: 10.1098/rspb.  
414 2014.2734. pmid: 25740889.



- 415 [18] GP Sætre, T Moum, S Bureš, M Král, M Adamjan, et al. “A Sexually Selected Character Dis-  
416 placement in Flycatchers Reinforces Premating Isolation”. In: *Nature* 387.6633 (1997), pp. 589–  
417 592. DOI: 10.1038/42451. pmid: 847.
- 418 [19] RE Naisbit, CD Jiggins, and J Mallet. “Disruptive Sexual Selection against Hybrids Con-  
419 tributes to Speciation between *Heliconius Cydno* and *Heliconius Melpomene*”. In: *Proceedings*  
420 *of the Royal Society of London B: Biological Sciences* 268.1478 (2001), pp. 1849–1854. DOI:  
421 10.1098/rspb.2001.1753. pmid: 11522205.
- 422 [20] VA Lukhtanov, NP Kandul, JB Plotkin, AV Dantchenko, D Haig, et al. “Reinforcement of Pre-  
423 Zygotic Isolation and Karyotype Evolution in *Agrodiaetus* Butterflies”. In: *Nature* 436.7049  
424 (2005), pp. 385–389. DOI: 10.1038/nature03704.
- 425 [21] PR Martin, R Montgomerie, and SC Loughheed. “Color Patterns of Closely Related Bird Species  
426 Are More Divergent at Intermediate Levels of Breeding-Range Sympatry”. In: *The American*  
427 *Naturalist* 185.4 (2015), pp. 443–451. DOI: 10.1086/680206.
- 428 [22] C Doutrelant, M Paquet, JP Renoult, A Grégoire, PA Crochet, et al. “Worldwide Patterns  
429 of Bird Colouration on Islands”. In: *Ecology Letters* 19.5 (2016), pp. 537–545. DOI: 10.1111/  
430 ele.12588.
- 431 [23] CR Hemingson, PF Cowman, JR Hodge, and DR Bellwood. “Colour Pattern Divergence in  
432 Reef Fish Species Is Rapid and Driven by Both Range Overlap and Symmetry”. In: *Ecology*  
433 *Letters* 22.1 (2019), pp. 190–199. DOI: 10.1111/ele.13180.
- 434 [24] ATD Bennett, IC Cuthill, and KJ Norris. “Sexual Selection and the Mismeasure of Color”. In:  
435 *The American Naturalist* 144.5 (1994), pp. 848–860. DOI: 10.1086/285711.
- 436 [25] IC Cuthill, ATD Bennett, JC Partridge, and EJ Maier. “Plumage Reflectance and the Objec-  
437 tive Assessment of Avian Sexual Dichromatism”. In: *The American Naturalist* 153.2 (1999),  
438 pp. 183–200. DOI: 10.1086/303160.
- 439 [26] JL Parra. “Color Evolution in the Hummingbird Genus *Coeligena*”. In: *Evolution* 64.2 (2010),  
440 pp. 324–335. DOI: 10.1111/j.1558-5646.2009.00827.x. pmid: 19703221.

- 441 [27] R Dakin and R Montgomerie. “Eye for an Eyespot: How Iridescent Plumage Ocelli Influence  
442 Peacock Mating Success”. In: *Behavioral Ecology* 24.5 (2013), pp. 1048–1057. DOI: 10.1093/  
443 behco/art045.
- 444 [28] S Villéger, NWH Mason, and D Mouillot. “New Multidimensional Functional Diversity Indices  
445 for a Multifaceted Framework in Functional Ecology”. In: *Ecology* 89.8 (2008), pp. 2290–2301.  
446 DOI: 10.1890/07-1206.1.
- 447 [29] J Del Hoyo, A Elliott, J Sargatal, DA Christie, and E de Juana. *Handbook of the Birds of the*  
448 *World Alive*. 2017. URL: [hbw.com](http://hbw.com).
- 449 [30] J Dorst. “Recherches sur la structure des plumes des trochilidés”. OCLC: 14220401. Paris:  
450 Université de Paris, 1951. 260 pp.
- 451 [31] H Dürer. “Schillerfarben der Vogelfeder als Evolutionsproblem”. Medizinischen Fakultät der  
452 Universität Basel, 1975.
- 453 [32] W Jetz, GH Thomas, JB Joy, K Hartmann, and AO Mooers. “The Global Diversity of Birds  
454 in Space and Time”. In: *Nature* 491.7424 (2012), pp. 444–448. DOI: 10.1038/nature11631.  
455 pmid: 23123857.
- 456 [33] JA McGuire, CC Witt, JVJ Remsen, A Corl, DL Rabosky, et al. “Molecular Phylogenetics  
457 and the Diversification of Hummingbirds”. In: *Current Biology* 24.8 (2014), pp. 910–916. DOI:  
458 10.1016/j.cub.2014.03.016. pmid: 24704078.
- 459 [34] SM Doucet and GE Hill. “Do Museum Specimens Accurately Represent Wild Birds? A Case  
460 Study of Carotenoid, Melanin, and Structural Colours in Long-Tailed Manakins *Chiroxiphia*  
461 *Linearis*”. In: *Journal of Avian Biology* 40.2 (2009), pp. 146–156. DOI: 10.1111/j.1600-  
462 048X.2009.03763.x.
- 463 [35] CH Graham, JL Parra, C Rahbek, and JA McGuire. “Phylogenetic Structure in Tropical Hum-  
464 mingbird Communities”. In: *Proceedings of the National Academy of Sciences* 106 (Supplement  
465 2 2009), pp. 19673–19678. DOI: 10.1073/pnas.0901649106. pmid: 19805042.
- 466 [36] JL Parra, JA McGuire, and CH Graham. “Incorporating Clade Identity in Analyses of Phylo-  
467 genetic Community Structure: An Example with Hummingbirds.” In: *The American Naturalist*  
468 176.5 (2010), pp. 573–587. DOI: 10.1086/656619. pmid: 20849270.

- 469 [37] RS Ridgely and PJ Greenfield. *The Birds of Ecuador: Status, Distribution and Taxonomy*.  
470 Ithaca, NY: Cornell University Press, 2001. 880 pp. ISBN: 978-0-8014-8720-0.
- 471 [38] MG Meadows, NI Morehouse, RL Rutowski, JM Douglas, and KJ McGraw. “Quantifying Iri-  
472 descent Coloration in Animals: A Method for Improving Repeatability”. In: *Behavioral Ecology*  
473 *and Sociobiology* 65.6 (2011), pp. 1317–1327. DOI: 10.1007/s00265-010-1135-5. pmid: 876.
- 474 [39] DM Chen and TH Goldsmith. “Four Spectral Classes of Cone in the Retinas of Birds”. In:  
475 *Journal of Comparative Physiology A* 159.4 (1986), pp. 473–479. DOI: 10.1007/BF00604167.
- 476 [40] TE White, RL Dalrymple, DW Noble, JC O’Hanlon, DB Zurek, et al. “Reproducible Research  
477 in the Study of Biological Coloration”. In: *Animal Behaviour* 106 (2015), pp. 51–57. DOI:  
478 10.1016/j.anbehav.2015.05.007.
- 479 [41] MG Meadows, TE Roudybush, and KJ McGraw. “Dietary Protein Level Affects Iridescent  
480 Coloration in Anna’s Hummingbirds, *Calypte Anna*”. In: *Journal of Experimental Biology*  
481 215.16 (2012), pp. 2742–2750. DOI: 10.1242/jeb.069351. pmid: 22837446.
- 482 [42] H Gruson, C Andraud, W Daney de Marcillac, S Berthier, M Elias, et al. “Quantitative Charac-  
483 terization of Iridescent Colours in Biological Studies: A Novel Method Using Optical Theory”.  
484 In: *Interface Focus* 9.1 (2019), p. 20180049. DOI: 10.1098/rsfs.2018.0049.
- 485 [43] R Maia, CM Eliason, PP Bitton, SM Doucet, and MD Shawkey. “Pavo: An R Package for  
486 the Analysis, Visualization and Organization of Spectral Data”. In: *Methods in Ecology and*  
487 *Evolution* 4.10 (2013), pp. 906–913. DOI: 10.1111/2041-210X.12069.
- 488 [44] JA Endler and PW Mielke. “Comparing Entire Colour Patterns as Birds See Them”. In: *Bi-*  
489 *ological Journal of the Linnean Society* 86.4 (2005), pp. 405–431. DOI: 10.1111/j.1095-  
490 8312.2005.00540.x.
- 491 [45] DC Osorio and M Vorobyev. “A Review of the Evolution of Animal Colour Vision and Visual  
492 Communication Signals”. In: *Vision Research*. Vision Research Reviews 48.20 (2008), pp. 2042–  
493 2051. DOI: 10.1016/j.visres.2008.06.018. pmid: 18627773.
- 494 [46] A Ödeen and O Håstad. “Complex Distribution of Avian Color Vision Systems Revealed by  
495 Sequencing the SWS1 Opsin from Total DNA”. In: *Molecular Biology and Evolution* 20.6  
496 (2003), pp. 855–861. DOI: 10.1093/molbev/msg108. pmid: 12716987.

- 497 [47] G Herrera, JC Zagal, M Diaz, MJ Fernández, A Vielma, et al. “Spectral Sensitivities of Pho-  
498 toreceptors and Their Role in Colour Discrimination in the Green-Backed Firecrown Hum-  
499 mingbird (*Sephanoides Sephaniodes*)”. In: *Journal of Comparative Physiology A* 194.9 (2008),  
500 p. 785. DOI: 10.1007/s00359-008-0349-8. pmid: 18584181.
- 501 [48] A Ödeen and O Håstad. “Pollinating Birds Differ in Spectral Sensitivity”. In: *Journal of Com-*  
502 *parative Physiology A* 196.2 (2010), pp. 91–96. DOI: 10.1007/s00359-009-0474-z.
- 503 [49] NS Hart. “Microspectrophotometry of Visual Pigments and Oil Droplets in a Marine Bird,  
504 the Wedge-Tailed Shearwater *Puffinus Pacificus*: Topographic Variations in Photoreceptor  
505 Spectral Characteristics”. In: *Journal of Experimental Biology* 207.7 (2004), pp. 1229–1240.  
506 DOI: 10.1242/jeb.00857. pmid: 14978063.
- 507 [50] DF Stotz, JW Fitzpatrick, TA Parker III, and DK Moskovits. *Neotropical Birds: Ecology and*  
508 *Conservation*. Vol. 3. OCLC: 32819832. University of Chicago Press, 1996. ISBN: 978-0-226-  
509 77629-3.
- 510 [51] MA Stoffel, S Nakagawa, and H Schielzeth. “rptR: Repeatability Estimation and Variance  
511 Decomposition by Generalized Linear Mixed-Effects Models”. In: *Methods in Ecology and Evo-*  
512 *lution* 8.11 (2017). Ed. by S Goslee, pp. 1639–1644. DOI: 10.1111/2041-210X.12797.
- 513 [52] MC Stoddard and RO Prum. “Evolution of Avian Plumage Color in a Tetrahedral Color Space:  
514 A Phylogenetic Analysis of New World Buntings.” In: *The American Naturalist* 171.6 (2008),  
515 pp. 755–776. DOI: 10.1086/587526.
- 516 [53] M Pagel and F Lutzoni. “Accounting for Phylogenetic Uncertainty in Comparative Studies of  
517 Evolution and Adaptation”. In: *Biological Evolution and Statistical Physics*. Ed. by M Läs-  
518 sig and A Valleriani. Vol. 585. Lecture Notes in Physics. Berlin, Heidelberg: Springer Berlin  
519 Heidelberg, 2002. ISBN: 978-3-540-43188-6. DOI: 10.1007/3-540-45692-9.
- 520 [54] OJ Hardy and B Senterre. “Characterizing the Phylogenetic Structure of Communities by an  
521 Additive Partitioning of Phylogenetic Diversity”. In: *Journal of Ecology* 95.3 (2007), pp. 493–  
522 506. DOI: 10.1111/j.1365-2745.2007.01222.x.

- 523 [55] C Baraloto, OJ Hardy, CET Paine, KG Dexter, C Cruaud, et al. “Using Functional Traits and  
524 Phylogenetic Trees to Examine the Assembly of Tropical Tree Communities”. In: *Journal of*  
525 *Ecology* 100.3 (2012), pp. 690–701. DOI: 10.1111/j.1365-2745.2012.01966.x.
- 526 [56] OJ Hardy. “Testing the Spatial Phylogenetic Structure of Local Communities: Statistical Per-  
527 formances of Different Null Models and Test Statistics on a Locally Neutral Community”. In:  
528 *Journal of Ecology* 96.5 (2008), pp. 914–926. DOI: 10.1111/j.1365-2745.2008.01421.x.
- 529 [57] F de Bello, P Šmilauer, JAF Diniz-Filho, CP Carmona, Z Lososová, et al. “Decoupling Phyloge-  
530 netic and Functional Diversity to Reveal Hidden Signals in Community Assembly”. In: *Methods*  
531 *in Ecology and Evolution* 8.10 (2017), pp. 1200–1211. DOI: 10.1111/2041-210X.12735.
- 532 [58] VN Balasubramanian, S Chakraborty, and S Panchanathan. “Conformal Predictions for Infor-  
533 mation Fusion”. In: *Annals of Mathematics and Artificial Intelligence* 74.1-2 (2015), pp. 45–65.  
534 DOI: 10.1007/s10472-013-9392-4.
- 535 [59] RK Suarez. “Hummingbird Flight: Sustaining the Highest Mass-Specific Metabolic Rates  
536 among Vertebrates”. In: *Experientia* 48.6 (1992), pp. 565–570. DOI: 10.1007/BF01920240.
- 537 [60] DL Altshuler, R Dudley, and JA McGuire. “Resolution of a Paradox: Hummingbird Flight at  
538 High Elevation Does Not Come without a Cost”. In: *Proceedings of the National Academy of*  
539 *Sciences* 101.51 (2004), pp. 17731–17736. DOI: 10.1073/pnas.0405260101. pmid: 15598748.
- 540 [61] DL Altshuler, FG Stiles, and R Dudley. “Of Hummingbirds and Helicopters: Hovering Costs,  
541 Competitive Ability, and Foraging Strategies.” In: *The American Naturalist* 163.1 (2004),  
542 pp. 16–25. DOI: 10.1086/380511. pmid: 14767833.
- 543 [62] AB Lindberg and JM Olesen. “The Fragility of Extreme Specialization: *Passiflora Mixta* and  
544 Its Pollinating Hummingbird *Ensifera Ensifera*”. In: *Journal of Tropical Ecology* 17.2 (2001),  
545 pp. 323–329. DOI: 10.1017/S0266467401001213.
- 546 [63] JA Tobias, R Planqué, DL Cram, and N Seddon. “Species Interactions and the Structure  
547 of Complex Communication Networks”. In: *Proceedings of the National Academy of Sciences*  
548 111.3 (2014), pp. 1020–1025. DOI: 10.1073/pnas.1314337111. pmid: 24395769.

- 549 [64] MK McNaught and IPF Owens. “Interspecific Variation in Plumage Colour among Birds:  
550 Species Recognition or Light Environment?” In: *Journal of Evolutionary Biology* 15.4 (2002),  
551 pp. 505–514. DOI: 10.1046/j.1420-9101.2002.00431.x.
- 552 [65] FG Stiles. “Aggressive and Courtship Displays of the Male Anna’s Hummingbird”. In: *The*  
553 *Condor* 84.2 (1982), pp. 208–225. DOI: 10.2307/1367674. JSTOR: 1367674.
- 554 [66] CJ Clark, TJ Feo, and I Escalante. “Courtship Displays and Natural History of Scintillant  
555 (*Selasphorus Scintilla*) and Volcano (*S. Flammula*) Hummingbirds”. In: *The Wilson Journal*  
556 *of Ornithology* 123.2 (2011), pp. 218–228. DOI: 10.1676/10-076.1.
- 557 [67] CM Eliason, MD Shawkey, and JA Clarke. “Evolutionary Shifts in the Melanin-Based Color  
558 System of Birds”. In: *Evolution* 70.2 (2016), pp. 445–454. DOI: 10.1111/evo.12855. pmid:  
559 26044706.
- 560 [68] P Matyjasiak. “Birds Associate Species-Specific Acoustic and Visual Cues: Recognition of  
561 Heterospecific Rivals by Male Blackcaps”. In: *Behavioral Ecology* 16.2 (2005), pp. 467–471.  
562 DOI: 10.1093/beheco/ari012.
- 563 [69] D Luther. “The Influence of the Acoustic Community on Songs of Birds in a Neotropical Rain  
564 Forest”. In: *Behavioral Ecology* 20.4 (2009), pp. 864–871. DOI: 10.1093/beheco/arp074.
- 565 [70] CJ Clark and TJ Feo. “The Anna’s Hummingbird Chirps with Its Tail: A New Mechanism  
566 of Sonation in Birds”. In: *Proceedings of the Royal Society of London B: Biological Sciences*  
567 275.1637 (2008), pp. 955–962. DOI: 10.1098/rspb.2007.1619. pmid: 18230592.
- 568 [71] CJ Clark, DO Elias, and RO Prum. “Aeroelastic Flutter Produces Hummingbird Feather  
569 Songs”. In: *Science* 333.6048 (2011), pp. 1430–1433. DOI: 10.1126/science.1205222. pmid:  
570 21903810.
- 571 [72] CJ Clark. “Wing, Tail, and Vocal Contributions to the Complex Acoustic Signals of Courting  
572 Calliope Hummingbirds”. In: *Current Zoology* 57.2 (2011), pp. 187–196. DOI: 10.1093/czoolo/  
573 57.2.187.
- 574 [73] FG Stiles and LL Wolf. “Ecology and Evolution of Lek Mating Behavior in the Long-Tailed  
575 Hermit Hummingbird”. In: *Ornithological Monographs* 27 (1979), pp. iii–78. DOI: 10.2307/  
576 40166760. JSTOR: 40166760.

- 577 [74] MA Pizo. “Lek Behavior of the Plovercrest (*Stephanoxis Lalandi*, Trochilidae)”. In: *The Wilson*  
578 *Journal of Ornithology* 124.1 (2012), pp. 106–112. DOI: 10.1676/11-055.1.
- 579 [75] TA Hurly, RD Scott, and SD Healy. “The Function of Displays of Male Rufous Hummingbirds”.  
580 In: *The Condor* 103.3 (2001), pp. 647–651. DOI: 10.1650/0010-5422(2001)103[0647:TFODOM]  
581 2.0.CO;2.
- 582 [76] RK Simpson and KJ McGraw. “Two Ways to Display: Male Hummingbirds Show Different  
583 Color-Display Tactics Based on Sun Orientation”. In: *Behavioral Ecology* 29.3 (2018), pp. 637–  
584 648. DOI: 10.1093/beheco/ary016.
- 585 [77] S Nakagawa and H Schielzeth. “Repeatability for Gaussian and Non-Gaussian Data: A Prac-  
586 tical Guide for Biologists”. In: *Biological Reviews* 85.4 (2010), pp. 935–956. DOI: 10.1111/j.  
587 1469-185X.2010.00141.x. pmid: 20569253.

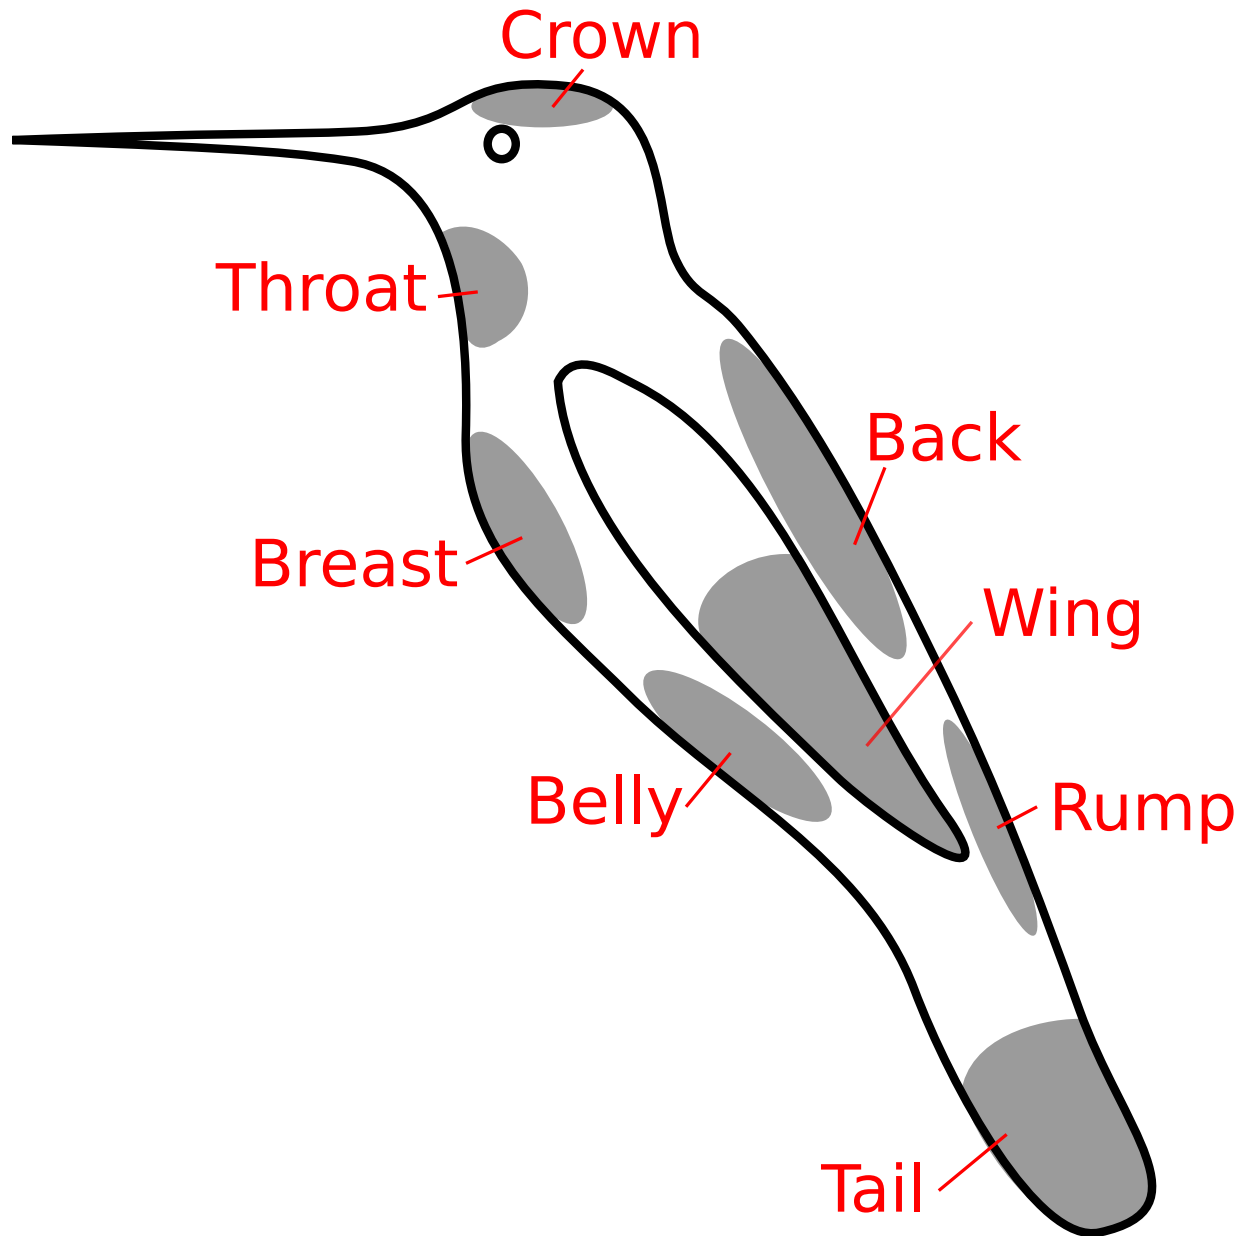

Supplementary figure 1: Locations and names of the 8 patches measured on all species. Additional patches were measured for each species as soon as they differed from one of the 8 patches listed here for a human observer, as detailed in the methods section and as in Gomez and Théry [7].



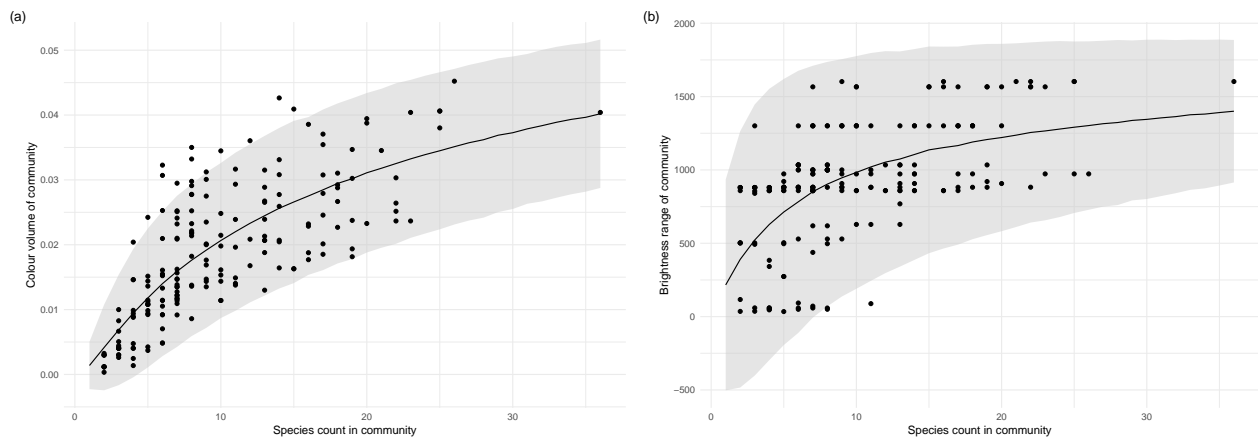

Figure 1: (a) community total colour volume and (b) brightness range increase with the number of species within the community. Each point is a community. The black solid line represents the mean value of (a) colour volume or (b) brightness range from 10 000 random communities with a given species count (null model) and the gray ribbon represents two standard deviations from the mean of the null model.

|                                                                                                                                                                                                             | $\tau_{ST} < 0$                                                                                                                                                                                                                                                  | $\tau_{ST} = 0$                                                                                                                                                                                                                                        | $\tau_{ST} > 0$                                                                                                                                                                                                                                        |
|-------------------------------------------------------------------------------------------------------------------------------------------------------------------------------------------------------------|------------------------------------------------------------------------------------------------------------------------------------------------------------------------------------------------------------------------------------------------------------------|--------------------------------------------------------------------------------------------------------------------------------------------------------------------------------------------------------------------------------------------------------|--------------------------------------------------------------------------------------------------------------------------------------------------------------------------------------------------------------------------------------------------------|
|                                                                                                                                                                                                             | Phenotypic overdispersion                                                                                                                                                                                                                                        | No community structure                                                                                                                                                                                                                                 | Phenotypic clustering                                                                                                                                                                                                                                  |
| $d\tau_{ST} < 0$                                                                                                                                                                                            | Co-occurring species are less similar than expected by chance because of character displacement.                                                                                                                                                                 | Co-occurring species are more neither less similar than expected by chance despite character displacement because closely related species co-occur more often than expected at random ( <b>phylogenetic clustering</b> ; $\Pi_{ST} > 0$ ).             | Co-occurring species are more similar than expected by chance despite character displacement because closely related species co-occur more often than expected at random ( <b>phylogenetic clustering</b> ; $\Pi_{ST} > 0$ ).                          |
| <b>Character displacement (divergence):</b> co-occurring species are more dissimilar than expected given their phylogenetic relationships, which means they evolved towards dissimilarity in their colours. |                                                                                                                                                                                                                                                                  |                                                                                                                                                                                                                                                        |                                                                                                                                                                                                                                                        |
| $d\tau_{ST} = 0$                                                                                                                                                                                            |                                                                                                                                                                                                                                                                  |                                                                                                                                                                                                                                                        |                                                                                                                                                                                                                                                        |
| <b>Brownian trait evolution</b>                                                                                                                                                                             | <b>Competitive exclusion:</b> co-occurring species are more dissimilar than expected by chance because distantly-related (and therefore dissimilar) species co-occur more often than expected at random ( <b>phylogenetic overdispersion</b> ; $\Pi_{ST} < 0$ ). | Co-occurring species are not more similar nor more different than expected by change or than predicted given their phylogenetic relationships.                                                                                                         | <b>Environmental filtering:</b> co-occurring species are more similar than expected by chance because closely-related (and therefore similar) species co-occur more often than expected at random ( <b>phylogenetic clustering</b> ; $\Pi_{ST} > 0$ ). |
| $d\tau_{ST} > 0$                                                                                                                                                                                            |                                                                                                                                                                                                                                                                  |                                                                                                                                                                                                                                                        |                                                                                                                                                                                                                                                        |
| <b>Evolutionary convergence</b> : co-occurring species are more similar than expected given their phylogenetic relationships, which means they evolved towards similarity in their colours.                 | Co-occurring species are less similar than expected by chance despite evolutionary convergence because distantly-related species co-occur more often than expected at random ( <b>phylogenetic overdispersion</b> ; $\Pi_{ST} < 0$ ).                            | Co-occurring species are neither more nor less similar than expected by chance despite evolutionary convergence because distantly-related species co-occur more often than expected at random ( <b>phylogenetic overdispersion</b> ; $\Pi_{ST} < 0$ ). | Co-occurring species are more similar than expected by chance because of evolutionary convergence.                                                                                                                                                     |

Supplementary table 1: Summary of the different evolutionary and ecological scenarios and their results in terms of values of  $\tau_{ST}$  and decoupled  $d\tau_{ST}$ .

Table 2: List of species with their provenance (Confluences = Musée des Confluences, Lyon, France, MNHN = Muséum National d’Histoire Naturelle, Paris, France) and strata. Strata data were extracted from Stotz et al. [50] and used in vision models.

| Species                               | Clade     | Provenance  | Strata     |
|---------------------------------------|-----------|-------------|------------|
| <i>Adelomyia melanogenys</i>          | Coquette  | Confluences | Understory |
| <i>Aglaeactis cupripennis</i>         | Brilliant | MNHN        | Canopy     |
| <i>Aglaiocercus coelestis</i>         | Coquette  | MNHN        | Canopy     |
| <i>Aglaiocercus kingi mocoa</i>       | Coquette  | MNHN        | Canopy     |
| <i>Amazilia amabilis</i>              | Emerald   | MNHN        | Understory |
| <i>Amazilia amazilia</i>              | Emerald   | MNHN        | Understory |
| <i>Amazilia fimbriata fluviatilis</i> | Emerald   | MNHN        | Canopy     |
| <i>Amazilia franciae</i>              | Emerald   | MNHN        | Canopy     |
| <i>Amazilia grayi meridionalis</i>    | Emerald   | MNHN        | Canopy     |
| <i>Amazilia rosenbergi</i>            | Emerald   | MNHN        | Understory |
| <i>Amazilia sapphirina</i>            | Emerald   | MNHN        | Canopy     |
| <i>Amazilia tzacatl jucunda</i>       | Emerald   | MNHN        | Canopy     |
| <i>Androdon aequatorialis</i>         | Mangoe    | MNHN        | Understory |
| <i>Anthracothorax nigricollis</i>     | Mangoe    | MNHN        | Canopy     |
| <i>Avocettula recurvirostris</i>      | Mangoe    | Confluences | Understory |
| <i>Boissonneaua flavescens</i>        | Brilliant | MNHN        | Canopy     |
| <i>Boissonneaua matthewsii</i>        | Brilliant | MNHN        | Canopy     |
| <i>Calliphlox amethystina</i>         | Bee       | MNHN        | Canopy     |
| <i>Calliphlox mitchellii</i>          | Bee       | Confluences | Canopy     |
| <i>Campylopterus falcatus</i>         | Emerald   | MNHN        | Understory |
| <i>Campylopterus largipennis</i>      | Emerald   | MNHN        | Understory |
| <i>Campylopterus villaviscensio</i>   | Emerald   | MNHN        | Understory |
| <i>Chaetocercus bombus</i>            | Bee       | MNHN        | Canopy     |
| <i>Chaetocercus mulsant</i>           | Bee       | MNHN        | Understory |
| <i>Chalcostigma herrani</i>           | Coquette  | MNHN        | Canopy     |
| <i>Chalcostigma ruficeps</i>          | Coquette  | Confluences | Understory |

| Species                                      | Clade     | Provenance  | Strata     |
|----------------------------------------------|-----------|-------------|------------|
| <i>Chalcostigma stanleyi stanleyi</i>        | Coquette  | MNHN        | Canopy     |
| <i>Chalybura buffonii intermedia</i>         | Emerald   | Confluences | Understory |
| <i>Chalybura urochrysia urochrysia</i>       | Emerald   | Confluences | Understory |
| <i>Chlorestes notata obsoletus-puruensis</i> | Emerald   | Confluences | Canopy     |
| <i>Chlorostilbon melanorhynchus</i>          | Emerald   | MNHN        | Understory |
| <i>Chlorostilbon mellisugus phoeopygus</i>   | Emerald   | Confluences | Understory |
| <i>Chrysuronia oenone</i>                    | Emerald   | MNHN        | Canopy     |
| <i>Coeligena coeligena</i>                   | Brilliant | MNHN        | Understory |
| <i>Coeligena iris hesperus</i>               | Brilliant | MNHN        | Understory |
| <i>Coeligena iris iris</i>                   | Brilliant | MNHN        | Understory |
| <i>Coeligena lutetiae</i>                    | Brilliant | MNHN        | Understory |
| <i>Coeligena torquata fulgidigula</i>        | Brilliant | MNHN        | Understory |
| <i>Coeligena torquata torquata</i>           | Brilliant | MNHN        | Understory |
| <i>Coeligena wilsoni</i>                     | Brilliant | MNHN        | Understory |
| <i>Colibri coruscans</i>                     | Mangoe    | MNHN        | Canopy     |
| <i>Colibri delphinae</i>                     | Mangoe    | MNHN        | Canopy     |
| <i>Colibri thalassinus</i>                   | Mangoe    | MNHN        | Canopy     |
| <i>Damophila julie</i>                       | Emerald   | MNHN        | Understory |
| <i>Discosura conversii</i>                   | Coquette  | MNHN        | Canopy     |
| <i>Discosura langsdorffi</i>                 | Coquette  | Confluences | Canopy     |
| <i>Discosura popelairii</i>                  | Coquette  | MNHN        | Canopy     |
| <i>Doryfera johannae</i>                     | Mangoe    | MNHN        | Understory |
| <i>Doryfera ludovicae</i>                    | Mangoe    | MNHN        | Understory |
| <i>Ensifera ensifera</i>                     | Brilliant | MNHN        | Understory |
| <i>Eriocnemis alinae</i>                     | Brilliant | MNHN        | Understory |
| <i>Eriocnemis luciani</i>                    | Brilliant | MNHN        | Understory |
| <i>Eriocnemis mosquera</i>                   | Brilliant | Confluences | Understory |
| <i>Eriocnemis nigrivestis</i>                | Brilliant | MNHN        | Understory |

| Species                                       | Clade     | Provenance  | Strata     |
|-----------------------------------------------|-----------|-------------|------------|
| <i>Eriocnemis vestita smaragdnicollis</i>     | Brilliant | MNHN        | Understory |
| <i>Eutoxeres aquila</i>                       | Hermit    | MNHN        | Understory |
| <i>Eutoxeres condamani</i>                    | Hermit    | Confluences | Understory |
| <i>Florisuga mellivora</i>                    | Topazes   | MNHN        | Canopy     |
| <i>Glaucis aeneus</i>                         | Hermit    | MNHN        | Understory |
| <i>Glaucis hirsutus affinis</i>               | Hermit    | MNHN        | Understory |
| <i>Haplophaedia aureliae russata</i>          | Brilliant | Confluences | Understory |
| <i>Haplophaedia lugens</i>                    | Brilliant | Confluences | Understory |
| <i>Heliangelus amethysticollis laticlavus</i> | Coquette  | Confluences | Understory |
| <i>Heliangelus exortis</i>                    | Coquette  | MNHN        | Understory |
| <i>Heliangelus exortis</i>                    | Coquette  | MNHN        | Understory |
| <i>Heliangelus micraster</i>                  | Coquette  | MNHN        | Understory |
| <i>Heliangelus strophianus</i>                | Coquette  | MNHN        | Understory |
| <i>Heliangelus viola</i>                      | Coquette  | MNHN        | Understory |
| <i>Heliodoxa aurescens</i>                    | Brilliant | MNHN        | Understory |
| <i>Heliodoxa imperatrix</i>                   | Brilliant | MNHN        | Understory |
| <i>Heliodoxa jacula jamesoni</i>              | Brilliant | MNHN        | Understory |
| <i>Heliodoxa leadbeateri</i>                  | Brilliant | MNHN        | Understory |
| <i>Heliodoxa rubinoides aequatorialis</i>     | Brilliant | MNHN        | Understory |
| <i>Heliodoxa schreibersii</i>                 | Brilliant | MNHN        | Understory |
| <i>Heliomaster longirostris</i>               | MtGem     | MNHN        | Canopy     |
| <i>Heliothyryx auritus</i>                    | Mangoe    | MNHN        | Canopy     |
| <i>Heliothyryx barroti</i>                    | Mangoe    | MNHN        | Canopy     |
| <i>Klais guimeti</i>                          | Emerald   | MNHN        | Understory |
| <i>Lafresnaya lafresnayi gayi</i>             | Brilliant | Confluences | Understory |
| <i>Lesbia nuna gracilis</i>                   | Coquette  | MNHN        | Canopy     |
| <i>Leucippus baeri</i>                        | Emerald   | Confluences | Understory |
| <i>Leucippus chlorocercus</i>                 | Emerald   | Confluences | Canopy     |

| Species                                      | Clade     | Provenance  | Strata     |
|----------------------------------------------|-----------|-------------|------------|
| <i>Lophornis chalybeus verreauxi</i>         | Coquette  | MNHN        | Canopy     |
| <i>Metallura baroni</i>                      | Coquette  | MNHN        | Canopy     |
| <i>Metallura tyrianthina tyrianthina</i>     | Coquette  | MNHN        | Understory |
| <i>Metallura williami primolina</i>          | Coquette  | MNHN        | Canopy     |
| <i>Myrmia micrura</i>                        | Bee       | MNHN        | Canopy     |
| <i>Ocreatus underwoodii melanantherus</i>    | Brilliant | MNHN        | Understory |
| <i>Opisthoprora euryptera</i>                | Coquette  | Confluences | Understory |
| <i>Oreotrochilus chimborazo chimborazo</i>   | Coquette  | MNHN        | Understory |
| <i>Oreotrochilus chimborazo jamesonii</i>    | Coquette  | MNHN        | Understory |
| <i>Patagona gigas</i>                        | Patagona  | MNHN        | Canopy     |
| <i>Phaethornis atrimentalis atrimentalis</i> | Hermit    | Confluences | Understory |
| <i>Phaethornis bourcierii</i>                | Hermit    | MNHN        | Understory |
| <i>Phaethornis griseogularis</i>             | Hermit    | MNHN        | Understory |
| <i>Phaethornis griseogularis</i>             | Hermit    | MNHN        | Understory |
| <i>Phaethornis guy</i>                       | Hermit    | MNHN        | Understory |
| <i>Phaethornis hispidus</i>                  | Hermit    | Confluences | Understory |
| <i>Phaethornis longirostris</i>              | Hermit    | Confluences | Understory |
| <i>Phaethornis malaris</i>                   | Hermit    | Confluences | Understory |
| <i>Phaethornis ruber</i>                     | Hermit    | Confluences | Understory |
| <i>Phaethornis syrmatophorus columbianus</i> | Hermit    | MNHN        | Understory |
| <i>Phaethornis yaruqui yaruqui</i>           | Hermit    | MNHN        | Understory |
| <i>Phlogophilus hemileucurus</i>             | Coquette  | MNHN        | Understory |
| <i>Polytmus theresiae leucorrhous</i>        | Mangoe    | MNHN        | Understory |
| <i>Pterophanes cyanopterus</i>               | Brilliant | MNHN        | Understory |
| <i>Ramphomicron microrhynchum</i>            | Coquette  | MNHN        | Canopy     |
| <i>Schistes geoffroyi</i>                    | Mangoe    | MNHN        | Understory |
| <i>Taphrospilus hypostictus</i>              | Emerald   | MNHN        | Understory |
| <i>Thalurania fannyi verticeps</i>           | Emerald   | MNHN        | Understory |

| Species                                | Clade     | Provenance  | Strata     |
|----------------------------------------|-----------|-------------|------------|
| <i>Thalurania furcata viridipectus</i> | Emerald   | MNHN        | Understory |
| <i>Thaumastura cora</i>                | Bee       | Confluences | Canopy     |
| <i>Threnetes leucurus cervinicauda</i> | Hermit    | Confluences | Understory |
| <i>Threnetes ruckeri</i>               | Hermit    | MNHN        | Understory |
| <i>Urochroa bougueri</i>               | Brilliant | Confluences | Understory |
| <i>Urochroa bougueri leucura</i>       | Brilliant | Confluences | Understory |
| <i>Urosticte benjamini</i>             | Brilliant | MNHN        | Understory |
| <i>Urosticte ruficrissa</i>            | Brilliant | Confluences | Understory |

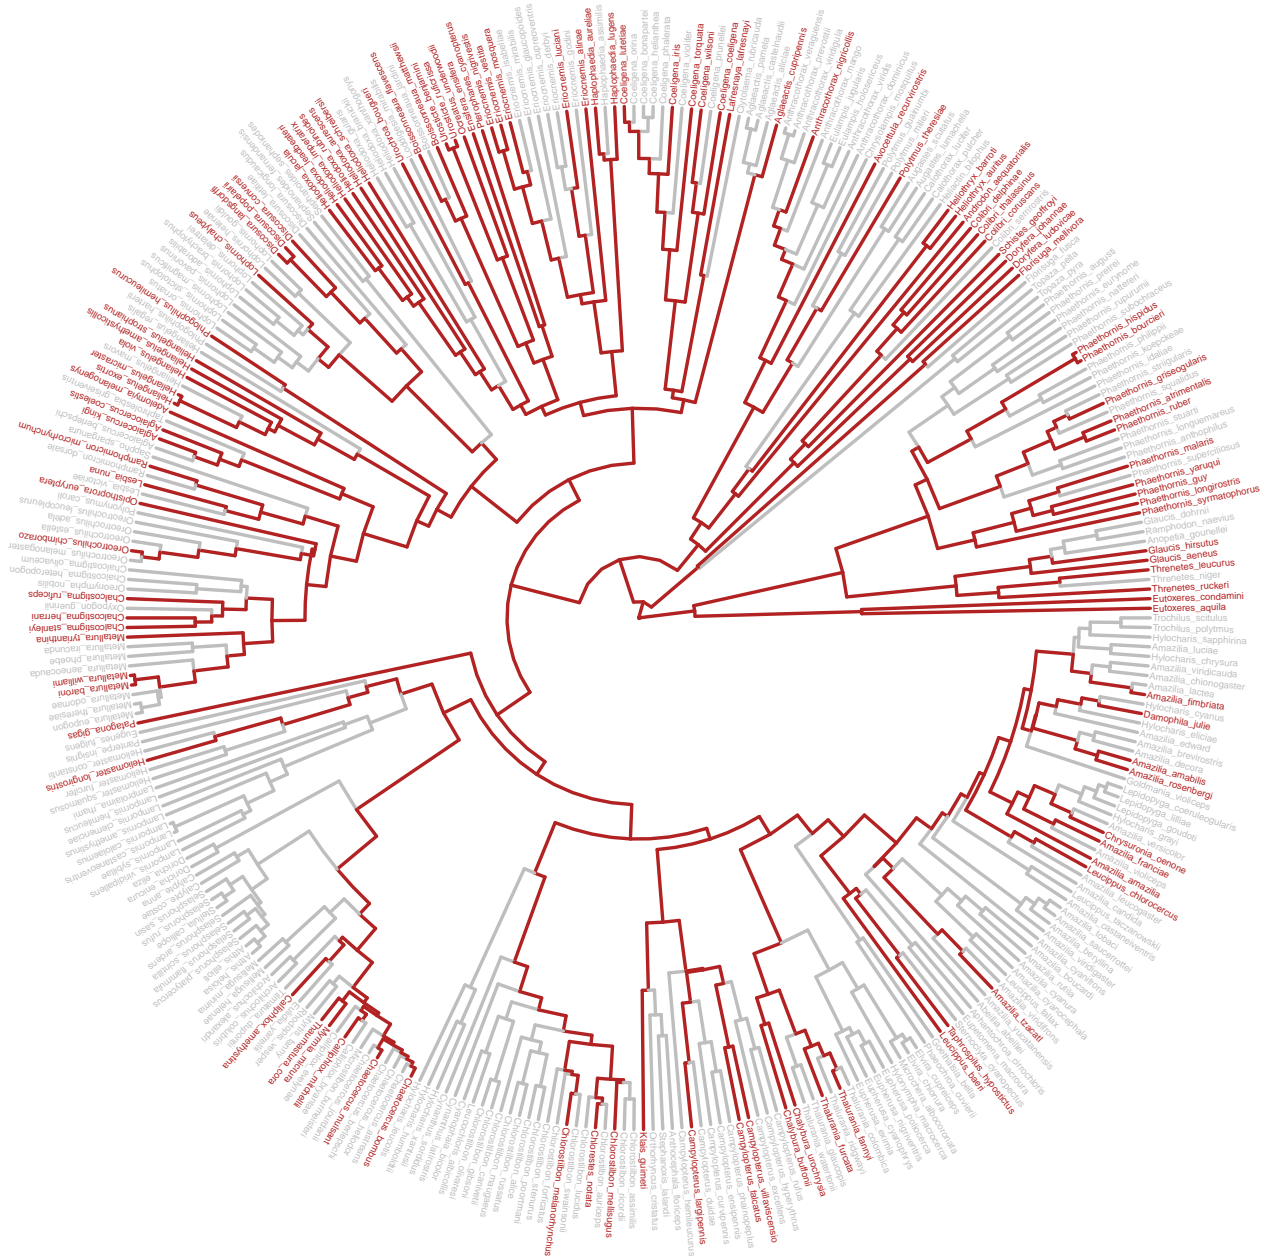

Supplementary figure 2: Phylogenetic coverage of the *Trochilidae* family in our dataset (species and lineages in red).



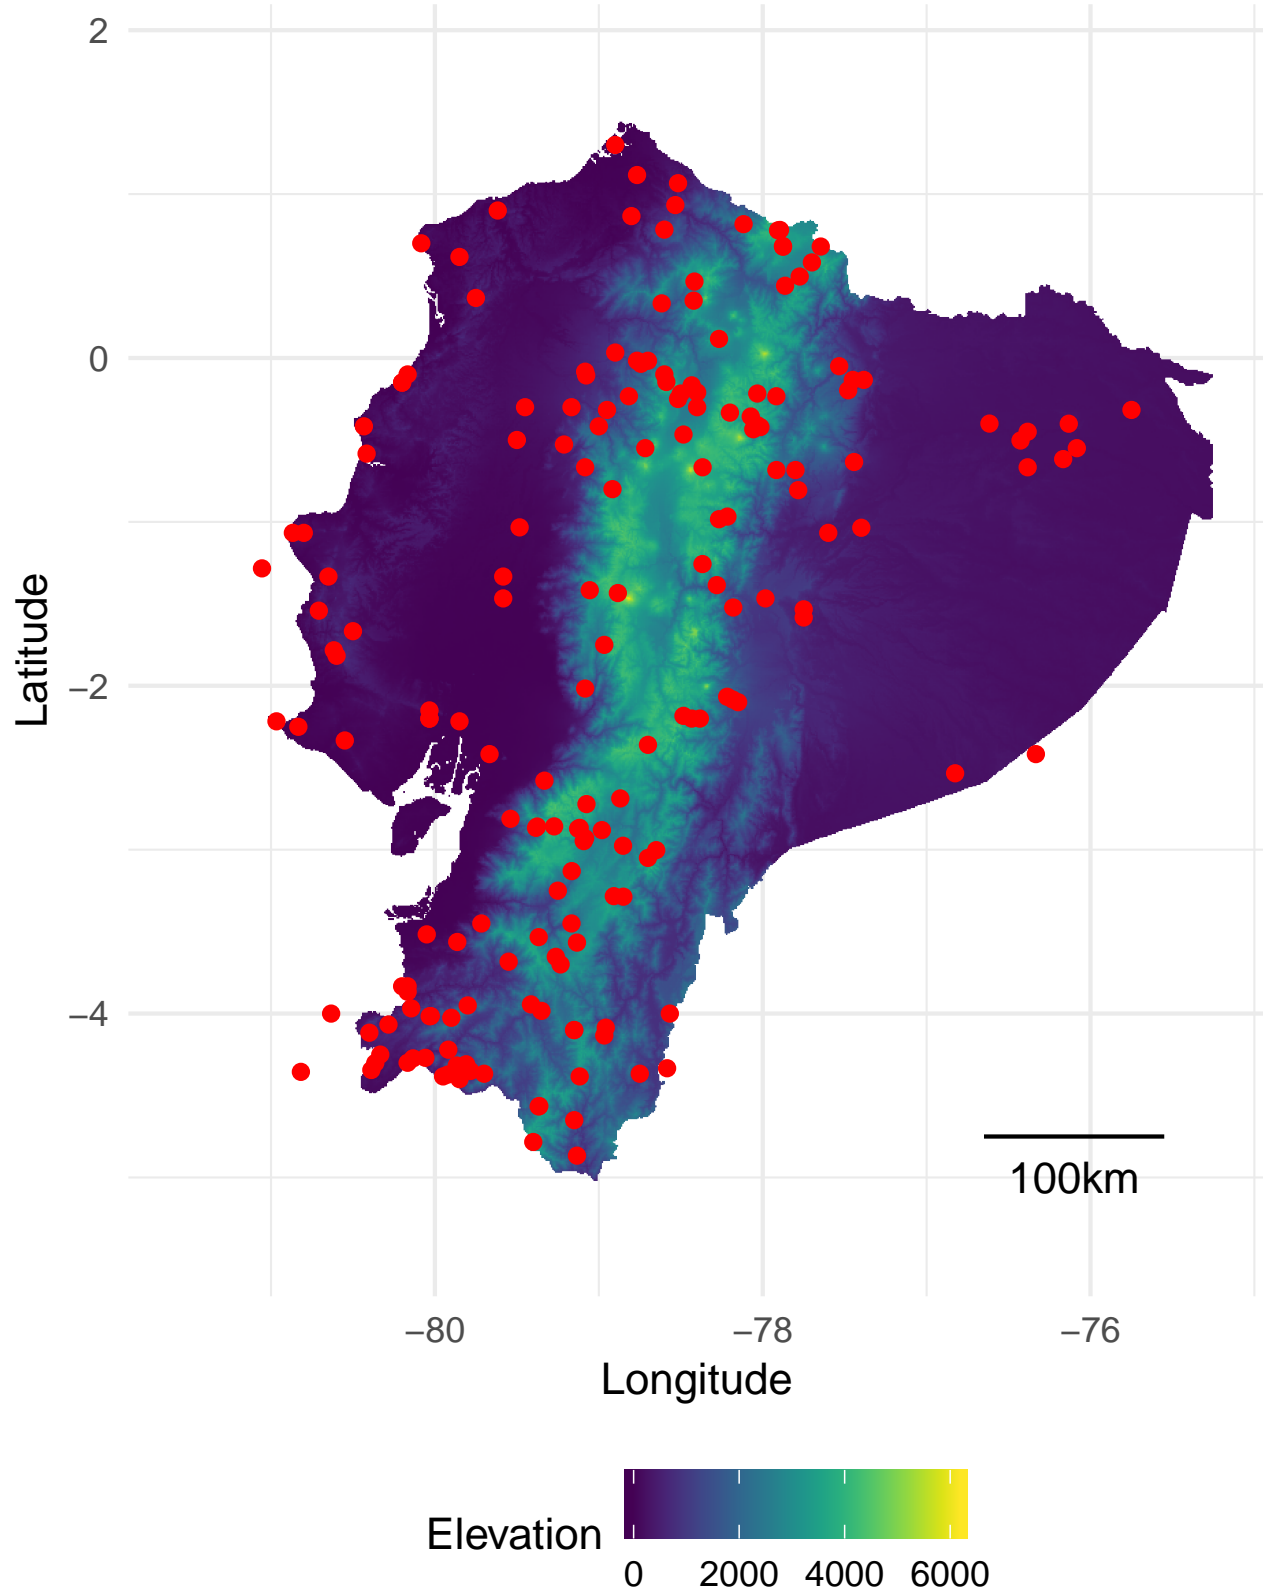

Supplementary figure 3: Study sites locations (red dots) plotted on an altitudinal map of Ecuador. Communities outside the borders of the map are on islands or close enough to Ecuador borders to be taken into account in our study.

| Variable   | R | p-value |         |
|------------|---|---------|---------|
|            | x | 0.925   | <0.0001 |
| Hue        | y | 0.951   | <0.0001 |
|            | z | 0.940   | <0.0001 |
| Brightness |   | 0.373   | 0.04    |

Supplementary table 2: We quantified the repeatability R (intra-class coefficient ICC) and the related p-value by bootstrapping using the `rptR` R package [77] of indices used in this study by performing the same measurements twice on two patches for 12 species (*Coeligena torquata*, *Colibri coruscans*, *Doryfera ludovicae*, *Heliangelus strophianus*, *Heliodoxa jamesonii*, *Heliiothryx barroti*, *Juliomyia julie*, *Lesbia nuna*, *Metallura tyrianthina*, *Ramphomicron microrhynchum*, *Schistes albogularis*, *Urosticte benjamini*). Patches were selected to be of similar hue from a human point of view.

| variable            | value               | Crown           | Back            | Rump         | Tail        | Throat          | Breast          | Belly           | Wing         |
|---------------------|---------------------|-----------------|-----------------|--------------|-------------|-----------------|-----------------|-----------------|--------------|
| Hue                 | $\tau_{st}$         | -0.0073         | 0.055           | 0.055        | 0.044       | 0.027           | 0.03            | 0.05            | 0.058        |
|                     | $p_{\tau_{st}<0}$   | 0.4             | 1               | 1            | 1           | 0.9             | 0.9             | 1               | 1            |
|                     | $p_{\tau_{st}>0}$   | 0.6             | <b>0.01</b>     | <b>0.01</b>  | <b>0.03</b> | 0.09            | 0.06            | <b>0.005</b>    | <b>0.006</b> |
| $d\mathcal{T}_{st}$ | $d\mathcal{T}_{st}$ | 0.0099          | 0.026           | -0.0021      | 0.0034      | -0.0021         | -0.0032         | -0.01           | 0.00073      |
|                     | $p_{\tau_{st}<0}$   | 1               | 1               | 0.8          | 1           | 0.9             | 0.3             | < <b>0.0001</b> | 1            |
|                     | $p_{\tau_{st}>0}$   | < <b>0.0001</b> | < <b>0.0001</b> | 1            | 0.2         | 1               | 1               | 1               | 1            |
| Brightness          | $\tau_{st}$         | -0.021          | 0.0078          | 0.0032       | -0.0064     | 0.00015         | 0.0041          | -0.0031         | 0.0091       |
|                     | $p_{\tau_{st}<0}$   | 0.1             | 0.7             | 0.6          | 0.5         | 0.5             | 0.6             | 0.5             | 0.6          |
|                     | $p_{\tau_{st}>0}$   | 0.9             | 0.3             | 0.4          | 0.5         | 0.5             | 0.4             | 0.5             | 0.4          |
| $d\mathcal{T}_{st}$ | $d\mathcal{T}_{st}$ | -0.0014         | 0.0028          | 0.00037      | 0.00068     | 0.013           | 0.023           | 0.007           | -0.0058      |
|                     | $p_{\tau_{st}<0}$   | 0.3             | 1               | 0.9          | 1           | 1               | 1               | 1               | 0.2          |
|                     | $p_{\tau_{st}>0}$   | 0.8             | 0.7             | 0.7          | 0.8         | < <b>0.0001</b> | < <b>0.0001</b> | <b>0.002</b>    | 1            |
| Hue shift           | $\tau_{st}$         | -0.007          | 0.051           | 0.052        | 0.043       | 0.027           | 0.029           | 0.049           | 0.058        |
|                     | $p_{\tau_{st}<0}$   | 0.4             | 1               | 1            | 1           | 0.9             | 0.9             | 1               | 1            |
|                     | $p_{\tau_{st}>0}$   | 0.6             | <b>0.01</b>     | <b>0.01</b>  | <b>0.03</b> | 0.08            | 0.06            | <b>0.006</b>    | <b>0.006</b> |
| $d\mathcal{T}_{st}$ | $d\mathcal{T}_{st}$ | 0.0087          | 0.0059          | -0.0068      | -0.006      | -0.0033         | 0.0023          | -0.0098         | -0.0018      |
|                     | $p_{\tau_{st}<0}$   | 1               | 1               | <b>0.005</b> | <b>0.01</b> | 0.6             | 1               | < <b>0.0001</b> | 1            |
|                     | $p_{\tau_{st}>0}$   | < <b>0.0001</b> | <b>0.03</b>     | 1            | 1           | 1               | 0.9             | 1               | 1            |

Supplementary table 3: Numerical values for  $\tau_{st}$  and decoupled  $\tau_{st}$  (denoted  $d\mathcal{T}_{st}$ ). P-values were computed by comparison of the actual value with the null distribution (obtained by randomisation of the communities using method 1s of Hardy [56]). Significant p-values are in bold and green. Positive values of  $d\mathcal{T}_{st}$  indicate phenotypic clustering whereas negative values indicate overdispersion.
